# Supplementary figures and images for: A Low-Cost, Low-Power Water Velocity Sensor Utilizing Acoustic Doppler Measurement
Source: MDPI journal article supplement (doi:10.3390/s22197451), 2022-09-30

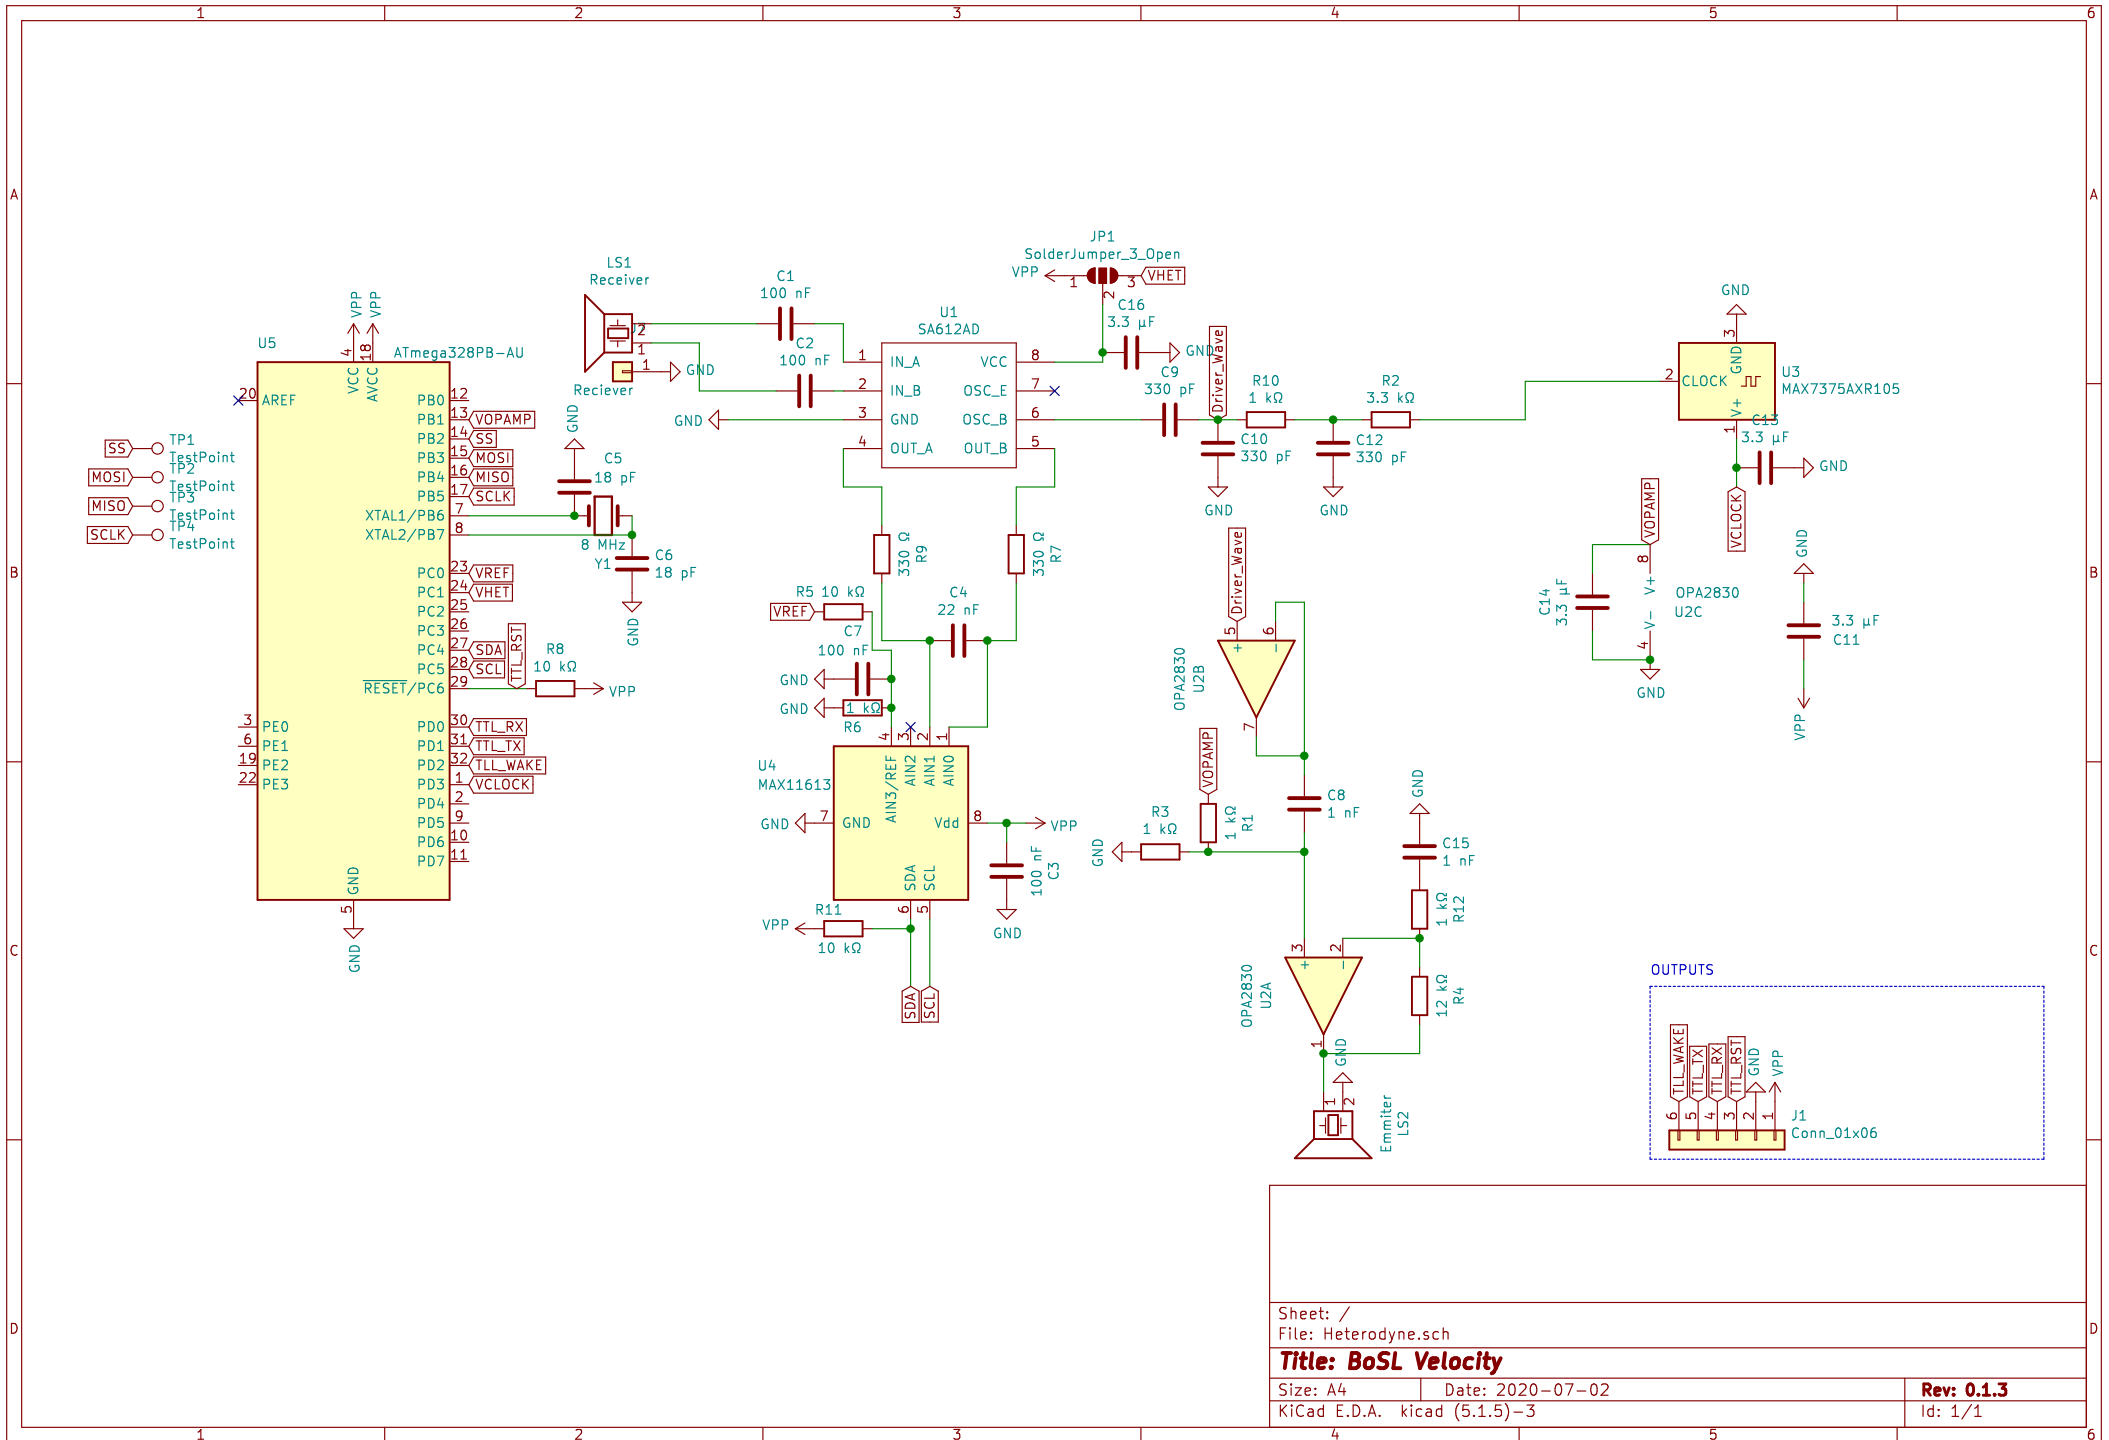

Supplement: s1 [file s1]
